# Supplementary material for: Catalytic C–C bond cleavage and C–Si bond formation in the reaction of RCN with Et3SiH promoted by an iron complex
Source: Royal Society of Chemistry journal article supplement (doi:10.1039/b504131g), 2005-01-01
Supplement: b504131g.pdf [file b504131g.pdf]

Electronic supplementary information (ESI)

*of*

**Catalytic C-C Bond Cleavage and C-Si Bond Formation in Reaction of RCN with Et<sub>3</sub>SiH Promoted by an Iron Complex**

Hiroshi Nakazawa,\* Kouji Kamata, and Masumi Itazaki

Department of Chemistry, Graduate School of Science, Osaka City University, Sumiyoshi-ku,  
Osaka, Japan.

All manipulations were carried out using standard Schlenk techniques under a nitrogen atmosphere. (C<sub>5</sub>R<sub>5</sub>)(CO)<sub>2</sub>FeMe (C<sub>5</sub>R<sub>5</sub> = C<sub>5</sub>H<sub>5</sub>,<sup>1</sup> C<sub>5</sub>H<sub>4</sub>Me,<sup>2</sup> C<sub>5</sub>HMe<sub>4</sub>,<sup>3</sup> C<sub>5</sub>Me<sub>5</sub>,<sup>4</sup> C<sub>5</sub>H<sub>4</sub>(SiMe<sub>3</sub>),<sup>5</sup> C<sub>5</sub>H<sub>4</sub>{P(O)(OMe)<sub>2</sub>}<sup>6</sup>), (Indenyl)(CO)<sub>2</sub>FeMe,<sup>7</sup> and (C<sub>5</sub>H<sub>5</sub>)(CO)<sub>2</sub>FeX (X = Cl,<sup>8</sup> I,<sup>9</sup> CH<sub>2</sub>Ph,<sup>10</sup> H<sup>11</sup>) were prepared according to the literature methods. Acetonitrile and THF were distilled from sodium and benzophenone prior to use. The other chemicals were commercially available. NMR spectra (<sup>1</sup>H, <sup>13</sup>C{<sup>1</sup>H}) were recorded on JEOL EX-400 spectrometer. Residual peaks of solvent were used as the reference for <sup>1</sup>H NMR (δ, ppm: chloroform-*d*<sub>3</sub>, 7.24; benzene-*d*<sub>6</sub>, 7.15). For <sup>13</sup>C{<sup>1</sup>H} NMR, solvent signals were used as the chemical shift reference. GC analysis was performed on a Shimadzu GC 14B equipped with a Rtx-1701 column (30 m x 0.25 mm, detector = FID, 250 °C) with helium gas as carrier. All yields and TONs were determined by GC using toluene as an internal standard.

**General method for catalytic H<sub>3</sub>C-CN bond cleavage:**

A solution of triethylsilane (15.00 mmol, 2.4 mL), acetonitrile (150.00 mmol, 7.86 mL), and Cp(CO)<sub>2</sub>Fe(Me) (0.83 mol%, 0.125 mmol, 24 mg) in THF (2.1 mL) was irradiated with a 400 W medium pressure mercury arc lamp at 50°C for 24 h in nitrogen atmosphere. After irradiation, toluene (0.2 mmol, 21.2 μL) was added into the reaction mixture. The resulting materials were not purified and were analyzed directly by GC (Yield: 99% / Et<sub>3</sub>SiH, TON: 118).

**General method for catalytic aryl(C)-CN bond cleavage:**

A solution of triethylsilane (11.40 mmol, 1.8 mL), isophthalonitrile (11.40 mmol, 1.46 g), and Cp(CO)<sub>2</sub>Fe(Me) (5.0 mol%, 0.57 mmol, 110 mg) in benzene (20 mL) was irradiated with a 400 W medium pressure mercury arc lamp at room temperature for 24 h in nitrogen atmosphere. After irradiation, toluene (0.57 mmol, 60  $\mu$ L) was added into the reaction mixtures. The resulting materials were analyzed directly by GC (Yield: 51% / Et<sub>3</sub>SiH, TON: 10.2).

*References*

1. T. S. Piper and G. Wilkinson, *J. Inorg. Nucl. Chem.*, 1956, **3**, 104.
2. R.B. King, *Organometallic Syntheses, Vol. 1: Transition-Metal Compounds*, Academic Press, New York (1965), p. 151.
3. (C<sub>5</sub>HMe<sub>4</sub>)(CO)<sub>2</sub>FeMe was prepared according to the analogous method<sup>1,2</sup> using 1,2,3,4-tetramethyl-1,3-cyclopentadiene.
4. R. B. King, W. M. Douglas, and A. Efraty, *J. Organomet. Chem.*, 1974, **69**, 131.
5. S. R. Berryhill and B. Sharenow, *J. Organomet. Chem.*, 1981, **221**, 143.
6. H. Nakazawa, K. Morimasa, Y. Kushi, and H. Yoneda, *Organometallics*, 1988, **7**, 458.
7. R. B. King and M. B. Bisenette, *Inorg. Chem.*, 1965, **4**, 475.
8. E. O. Fischer and E. Moser, *Inorg. Synth.*, 1971, **12**, 36.
9. R. B. King and F. G. A. Stone, *Inorg. Synth.*, 1963, **7**, 110.
10. J. P. Bibler and A. Wojcicki, *J. Am. Chem. Soc.*, 1966, **88**, 4862.
11. T. A. Shackleton and M. C. Baird, *Organometallics*, 1989, **8**, 2225.
